# Supplementary material for: A high-density genetic map constructed using specific length amplified fragment (SLAF) sequencing and QTL mapping of seed-related traits in sesame (Sesamum indicum L.)
Source: PubMed Central journal article supplement (PMC6935206; doi:10.1186/s12870-019-2172-5), 2019-12-27
Supplement: 12870_2019_2172_MOESM1_ESM.pdf [file 12870_2019_2172_MOESM1_ESM.pdf]

**Table S1 Pairwise correlation coefficients between thousand seed weight and seed size traits for sesame under two environments**

| Environment     | Trait      | tsw      | sl       | sw       | lwr      | sp       | sd       | sa       | sc |
|-----------------|------------|----------|----------|----------|----------|----------|----------|----------|----|
| <b>Hainan</b>   | <b>tsw</b> | 1        |          |          |          |          |          |          |    |
|                 | <b>sl</b>  | 0.286**  | 1        |          |          |          |          |          |    |
|                 | <b>sw</b>  | 0.473**  | 0.904**  | 1        |          |          |          |          |    |
|                 | <b>lwr</b> | -0.393** | 0.281**  | -0.154   | 1        |          |          |          |    |
|                 | <b>sp</b>  | 0.357**  | 0.987**  | 0.951**  | 0.147    | 1        |          |          |    |
|                 | <b>sd</b>  | 0.360**  | 0.986**  | 0.960**  | 0.123    | 0.996**  | 1        |          |    |
|                 | <b>sa</b>  | 0.397**  | 0.974**  | 0.975**  | 0.062    | 0.992**  | 0.996**  | 1        |    |
|                 | <b>sc</b>  | 0.331**  | -0.454** | -0.040   | -0.963** | -0.333** | -0.305** | -0.251** | 1  |
| <b>Yuanyang</b> | <b>tsw</b> | 1        |          |          |          |          |          |          |    |
|                 | <b>sl</b>  | -0.184*  | 1        |          |          |          |          |          |    |
|                 | <b>sw</b>  | -0.200*  | 0.936**  | 1        |          |          |          |          |    |
|                 | <b>lwr</b> | -0.028   | 0.470**  | 0.130    | 1        |          |          |          |    |
|                 | <b>sp</b>  | -0.186*  | 0.993**  | 0.964**  | 0.382**  | 1        |          |          |    |
|                 | <b>sd</b>  | -0.205*  | 0.984**  | 0.981**  | 0.313**  | 0.993**  | 1        |          |    |
|                 | <b>sa</b>  | -0.197*  | 0.983**  | 0.982**  | 0.307**  | 0.993**  | 0.999**  | 1        |    |
|                 | <b>sc</b>  | 0.064    | -0.602** | -0.287** | -0.976** | -0.522** | -0.461** | -0.454** | 1  |

\*Significant at  $P \leq 0.05$ ; \*\*Significant at  $P \leq 0.01$ .

tsw, thousand seed weight; sl, seed length; sw, seed width; lwr, length-to-width ratio; sp, seed perimeter; sd, seed diameter; sa, seed area; sc, seed circularity.
