# Supplementary material for: A high-density genetic map constructed using specific length amplified fragment (SLAF) sequencing and QTL mapping of seed-related traits in sesame (Sesamum indicum L.)
Source: PubMed Central journal article supplement (PMC6935206; doi:10.1186/s12870-019-2172-5), 2019-12-27
Supplement: 12870_2019_2172_MOESM3_ESM.pdf [file 12870_2019_2172_MOESM3_ESM.pdf]

**Table S1 Pairwise correlation coefficients between thousand seed weight and seed size traits for sesame under two environments**

| Environment     | Trait      | tsw      | sl       | sw       | lwr      | sp       | sd       | sa       | sc |
|-----------------|------------|----------|----------|----------|----------|----------|----------|----------|----|
| <b>Hainan</b>   | <b>tsw</b> | 1        |          |          |          |          |          |          |    |
|                 | <b>sl</b>  | 0.286**  | 1        |          |          |          |          |          |    |
|                 | <b>sw</b>  | 0.473**  | 0.904**  | 1        |          |          |          |          |    |
|                 | <b>lwr</b> | -0.393** | 0.281**  | -0.154   | 1        |          |          |          |    |
|                 | <b>sp</b>  | 0.357**  | 0.987**  | 0.951**  | 0.147    | 1        |          |          |    |
|                 | <b>sd</b>  | 0.360**  | 0.986**  | 0.960**  | 0.123    | 0.996**  | 1        |          |    |
|                 | <b>sa</b>  | 0.397**  | 0.974**  | 0.975**  | 0.062    | 0.992**  | 0.996**  | 1        |    |
|                 | <b>sc</b>  | 0.331**  | -0.454** | -0.040   | -0.963** | -0.333** | -0.305** | -0.251** | 1  |
| <b>Yuanyang</b> | <b>tsw</b> | 1        |          |          |          |          |          |          |    |
|                 | <b>sl</b>  | -0.184*  | 1        |          |          |          |          |          |    |
|                 | <b>sw</b>  | -0.200*  | 0.936**  | 1        |          |          |          |          |    |
|                 | <b>lwr</b> | -0.028   | 0.470**  | 0.130    | 1        |          |          |          |    |
|                 | <b>sp</b>  | -0.186*  | 0.993**  | 0.964**  | 0.382**  | 1        |          |          |    |
|                 | <b>sd</b>  | -0.205*  | 0.984**  | 0.981**  | 0.313**  | 0.993**  | 1        |          |    |
|                 | <b>sa</b>  | -0.197*  | 0.983**  | 0.982**  | 0.307**  | 0.993**  | 0.999**  | 1        |    |
|                 | <b>sc</b>  | 0.064    | -0.602** | -0.287** | -0.976** | -0.522** | -0.461** | -0.454** | 1  |

\*Significant at  $P \leq 0.05$ ; \*\*Significant at  $P \leq 0.01$ .

tsw, thousand seed weight; sl, seed length; sw, seed width; lwr, length-to-width ratio; sp, seed perimeter; sd, seed diameter; sa, seed area; sc, seed circularity.

**Table S2 Pairwise correlation coefficients of sesame seed coat color traits under two environments**

| Environment     | Trait     | L*      | a*      | b*      | L       | a       | b       | X       | Y       | Z |
|-----------------|-----------|---------|---------|---------|---------|---------|---------|---------|---------|---|
| <b>Hainan</b>   | <b>L*</b> | 1       |         |         |         |         |         |         |         |   |
|                 | <b>a*</b> | 0.776** | 1       |         |         |         |         |         |         |   |
|                 | <b>b*</b> | 0.925** | 0.901** | 1       |         |         |         |         |         |   |
|                 | <b>L</b>  | 0.999** | 0.762** | 0.914** | 1       |         |         |         |         |   |
|                 | <b>a</b>  | 0.825** | 0.993** | 0.920** | 0.814** | 1       |         |         |         |   |
|                 | <b>b</b>  | 0.960** | 0.878** | 0.993** | 0.954** | 0.909** | 1       |         |         |   |
|                 | <b>X</b>  | 0.984** | 0.732** | 0.884** | 0.991** | 0.793** | 0.933** | 1       |         |   |
|                 | <b>Y</b>  | 0.982** | 0.708** | 0.873** | 0.990** | 0.771** | 0.924** | 0.999** | 1       |   |
|                 | <b>Z</b>  | 0.953** | 0.599** | 0.780** | 0.963** | 0.667** | 0.845** | 0.975** | 0.982** | 1 |
| <b>Yuanyang</b> | <b>L*</b> | 1       |         |         |         |         |         |         |         |   |
|                 | <b>a*</b> | 0.593** | 1       |         |         |         |         |         |         |   |
|                 | <b>b*</b> | 0.918** | 0.803** | 1       |         |         |         |         |         |   |
|                 | <b>L</b>  | 0.999** | 0.584** | 0.911** | 1       |         |         |         |         |   |
|                 | <b>a</b>  | 0.675** | 0.992** | 0.850** | 0.668** | 1       |         |         |         |   |
|                 | <b>b</b>  | 0.955** | 0.760** | 0.993** | 0.951** | 0.819** | 1       |         |         |   |
|                 | <b>X</b>  | 0.985** | 0.586** | 0.896** | 0.991** | 0.675** | 0.941** | 1       |         |   |
|                 | <b>Y</b>  | 0.984** | 0.549** | 0.881** | 0.991** | 0.639** | 0.930** | 0.999** | 1       |   |
|                 | <b>Z</b>  | 0.960** | 0.410** | 0.784** | 0.968** | 0.508** | 0.849** | 0.971** | 0.980** | 1 |

\*Significant at  $P \leq 0.05$ ; \*\*Significant at  $P \leq 0.01$ .

**Table S3 SLAF-seq data for each of the F<sub>2</sub> individual and their parents**

| <b>Individuals</b>       | <b>Q20 (%)</b> | <b>Q30 (%)</b> | <b>GC (%)</b> | <b>Read numbers</b> | <b>Average coverage</b> | <b>Number of SLAF markers</b> | <b>Read numbers for SLAFs</b> |        |
|--------------------------|----------------|----------------|---------------|---------------------|-------------------------|-------------------------------|-------------------------------|--------|
| <b>Gaoyou 8 (female)</b> | 90.69          | 83.95          | 40.36         | 11526675            | 37.60                   | 133354                        | 5014023                       |        |
| <b>Ganzhi 6 (male)</b>   | 89.66          | 82.48          | 40.93         | 10664675            | 35.97                   | 123679                        | 4448310                       |        |
| <b>F<sub>2</sub></b>     | 1              | 89.51          | 82.35         | 41.01               | 831785                  | 3.77                          | 94243                         | 354869 |
|                          | 2              | 90.46          | 83.67         | 40.94               | 582966                  | 3.08                          | 79938                         | 246030 |
|                          | 3              | 90.84          | 83.93         | 40.76               | 944539                  | 4.55                          | 95948                         | 436120 |
|                          | 4              | 90.23          | 83.29         | 40.72               | 910610                  | 4.49                          | 93356                         | 418912 |
|                          | 5              | 90.52          | 83.67         | 40.78               | 1096002                 | 4.76                          | 96168                         | 457750 |
|                          | 6              | 89.91          | 82.77         | 41.02               | 804341                  | 3.76                          | 93265                         | 351060 |
|                          | 7              | 90.12          | 83.29         | 40.84               | 723452                  | 3.48                          | 88707                         | 308415 |
|                          | 8              | 90.35          | 83.45         | 40.59               | 946211                  | 4.25                          | 95144                         | 404796 |
|                          | 9              | 88.09          | 80.91         | 41.56               | 381586                  | 2.17                          | 65255                         | 141823 |
|                          | 10             | 89.99          | 83.05         | 40.74               | 1154563                 | 4.99                          | 99117                         | 494338 |
|                          | 11             | 88.59          | 81.30         | 41.47               | 547276                  | 2.79                          | 80031                         | 223437 |
|                          | 12             | 90.24          | 83.47         | 41.10               | 693079                  | 3.08                          | 83765                         | 258404 |
|                          | 13             | 90.61          | 83.85         | 40.37               | 1177656                 | 5.36                          | 98799                         | 529319 |
|                          | 14             | 90.31          | 83.46         | 40.64               | 889144                  | 4.27                          | 92744                         | 395786 |
|                          | 15             | 88.89          | 81.43         | 41.21               | 613386                  | 3.04                          | 83152                         | 252680 |
|                          | 16             | 89.40          | 82.28         | 40.60               | 1007807                 | 4.59                          | 97943                         | 449152 |
|                          | 17             | 90.30          | 83.56         | 41.22               | 579676                  | 2.86                          | 82311                         | 235600 |
|                          | 18             | 88.62          | 81.33         | 41.25               | 493450                  | 2.69                          | 75001                         | 201729 |
|                          | 19             | 89.82          | 82.59         | 40.74               | 756499                  | 3.76                          | 91566                         | 344132 |
|                          | 20             | 87.49          | 79.63         | 41.21               | 572630                  | 2.76                          | 77426                         | 213785 |
|                          | 21             | 90.50          | 83.64         | 40.30               | 926109                  | 4.46                          | 91013                         | 406224 |
|                          | 22             | 90.24          | 83.41         | 40.75               | 796147                  | 3.73                          | 92406                         | 344675 |
|                          | 23             | 87.66          | 80.31         | 40.85               | 446502                  | 2.35                          | 67003                         | 157788 |
|                          | 24             | 87.90          | 80.09         | 41.02               | 606200                  | 3.08                          | 84806                         | 261010 |
|                          | 25             | 88.85          | 81.38         | 40.97               | 747342                  | 3.54                          | 87480                         | 309632 |
|                          | 26             | 89.07          | 81.55         | 41.23               | 569973                  | 2.93                          | 78410                         | 229581 |
|                          | 27             | 89.10          | 81.62         | 40.68               | 830189                  | 3.92                          | 87503                         | 342878 |
|                          | 28             | 89.30          | 81.86         | 40.61               | 972951                  | 4.74                          | 96572                         | 457626 |
|                          | 29             | 90.33          | 83.35         | 40.96               | 1020408                 | 4.58                          | 96902                         | 443706 |
|                          | 30             | 88.15          | 80.94         | 41.24               | 620492                  | 2.75                          | 78810                         | 216692 |
|                          | 31             | 89.54          | 82.49         | 41.14               | 834510                  | 3.60                          | 93621                         | 336731 |
|                          | 32             | 90.92          | 84.28         | 40.98               | 939657                  | 3.79                          | 98355                         | 373049 |
|                          | 33             | 90.51          | 83.54         | 40.71               | 719186                  | 3.55                          | 84447                         | 300116 |
|                          | 34             | 87.38          | 79.77         | 40.92               | 860730                  | 3.67                          | 98341                         | 361046 |
|                          | 35             | 89.48          | 82.34         | 40.94               | 1031968                 | 4.77                          | 100327                        | 478393 |
|                          | 36             | 90.24          | 83.34         | 40.76               | 834442                  | 3.84                          | 91992                         | 353084 |
|                          | 37             | 90.83          | 83.94         | 40.39               | 1034357                 | 4.55                          | 94490                         | 430316 |
|                          | 38             | 89.99          | 82.89         | 40.54               | 857542                  | 4.09                          | 90762                         | 371154 |

|    |       |       |       |         |      |        |        |
|----|-------|-------|-------|---------|------|--------|--------|
| 39 | 91.05 | 84.37 | 40.58 | 623846  | 3.15 | 83853  | 263975 |
| 40 | 88.91 | 81.09 | 40.61 | 999548  | 4.27 | 95935  | 409461 |
| 41 | 89.34 | 81.75 | 40.49 | 969038  | 4.43 | 92437  | 409739 |
| 42 | 90.42 | 83.40 | 40.71 | 958439  | 4.53 | 96651  | 437521 |
| 43 | 90.96 | 84.10 | 40.21 | 974598  | 4.33 | 93906  | 406542 |
| 44 | 89.32 | 82.31 | 40.84 | 516354  | 2.76 | 75704  | 208793 |
| 45 | 85.39 | 77.75 | 43.19 | 424726  | 2.11 | 61865  | 130508 |
| 46 | 89.46 | 82.45 | 40.51 | 1255700 | 5.37 | 106727 | 572936 |
| 47 | 84.37 | 77.13 | 41.75 | 320046  | 1.97 | 50181  | 98712  |
| 48 | 90.48 | 83.60 | 40.62 | 1018871 | 4.59 | 94716  | 434629 |
| 49 | 88.62 | 80.83 | 40.46 | 985148  | 4.49 | 95769  | 429937 |
| 50 | 90.09 | 82.95 | 40.53 | 1172088 | 4.79 | 97366  | 466741 |
| 51 | 90.46 | 83.46 | 40.46 | 1392355 | 5.52 | 105603 | 582541 |
| 52 | 91.24 | 84.62 | 39.76 | 1242179 | 5.79 | 97334  | 563084 |
| 53 | 91.11 | 84.38 | 40.44 | 1458974 | 6.43 | 106126 | 682816 |
| 54 | 89.79 | 82.83 | 40.42 | 1645522 | 6.61 | 106958 | 707422 |
| 55 | 90.74 | 83.99 | 40.54 | 1478458 | 6.58 | 103083 | 678363 |
| 56 | 88.84 | 81.59 | 40.80 | 1045902 | 4.62 | 96989  | 447899 |
| 57 | 89.74 | 82.74 | 40.22 | 1186831 | 5.25 | 97354  | 511389 |
| 58 | 89.96 | 83.13 | 39.93 | 1667830 | 7.13 | 106194 | 757413 |
| 59 | 89.69 | 82.79 | 40.14 | 1467880 | 6.63 | 101982 | 675705 |
| 60 | 90.54 | 83.74 | 39.94 | 1716104 | 7.88 | 101296 | 798502 |
| 61 | 89.52 | 82.37 | 40.24 | 1302480 | 5.68 | 103607 | 588287 |
| 62 | 91.55 | 84.91 | 40.20 | 1236630 | 5.90 | 96571  | 569545 |
| 63 | 90.53 | 83.79 | 40.28 | 1523702 | 6.81 | 103767 | 706955 |
| 64 | 90.38 | 83.56 | 40.01 | 1243520 | 5.36 | 94004  | 503973 |
| 65 | 91.16 | 84.46 | 39.91 | 2119037 | 9.29 | 102621 | 953013 |
| 66 | 90.32 | 83.49 | 40.01 | 1372916 | 6.28 | 102764 | 645802 |
| 67 | 89.84 | 82.76 | 40.30 | 1585389 | 6.45 | 106961 | 690235 |
| 68 | 90.62 | 83.89 | 40.25 | 1613027 | 6.75 | 106876 | 721450 |
| 69 | 90.40 | 83.49 | 40.33 | 1306966 | 5.69 | 104515 | 594606 |
| 70 | 91.13 | 84.48 | 40.62 | 988449  | 4.18 | 97560  | 407552 |
| 71 | 90.96 | 84.28 | 40.02 | 1402607 | 6.63 | 100335 | 665565 |
| 72 | 90.77 | 83.98 | 40.17 | 1001654 | 4.85 | 95748  | 464814 |
| 73 | 90.09 | 83.22 | 40.69 | 1349112 | 6.17 | 104581 | 645050 |
| 74 | 90.01 | 83.01 | 40.08 | 1568318 | 6.83 | 98219  | 671086 |
| 75 | 90.45 | 83.59 | 40.31 | 1686604 | 7.04 | 101884 | 717452 |
| 76 | 90.76 | 83.84 | 40.20 | 1362713 | 6.38 | 101280 | 646162 |
| 77 | 89.99 | 82.76 | 40.42 | 956251  | 4.17 | 96047  | 400044 |
| 78 | 89.42 | 81.70 | 40.27 | 1148639 | 5.08 | 95750  | 486589 |
| 79 | 90.67 | 83.68 | 39.93 | 1281933 | 6.04 | 97056  | 586592 |
| 80 | 90.25 | 83.11 | 39.98 | 1584361 | 6.97 | 100674 | 701707 |
| 81 | 89.93 | 82.85 | 40.33 | 1566610 | 6.87 | 106632 | 732320 |
| 82 | 90.43 | 83.44 | 40.30 | 1696533 | 7.28 | 103094 | 750583 |

|     |       |       |       |         |      |        |        |
|-----|-------|-------|-------|---------|------|--------|--------|
| 83  | 90.63 | 83.78 | 40.02 | 1198463 | 5.37 | 94737  | 508378 |
| 84  | 90.27 | 83.20 | 40.38 | 992497  | 4.53 | 91043  | 412238 |
| 85  | 89.53 | 82.40 | 40.28 | 1522623 | 6.32 | 104018 | 657074 |
| 86  | 89.56 | 82.38 | 40.24 | 1125607 | 4.91 | 90248  | 442862 |
| 87  | 89.52 | 82.38 | 40.86 | 1296257 | 5.16 | 106465 | 549696 |
| 88  | 89.86 | 82.76 | 40.24 | 1435622 | 5.82 | 91407  | 531923 |
| 89  | 90.30 | 83.35 | 40.42 | 1235114 | 5.48 | 95590  | 523576 |
| 90  | 90.64 | 83.78 | 40.51 | 1459885 | 5.89 | 103272 | 608513 |
| 91  | 90.53 | 83.70 | 40.64 | 1297479 | 5.24 | 104945 | 549963 |
| 92  | 90.89 | 84.12 | 40.00 | 1271354 | 5.92 | 92812  | 549294 |
| 93  | 90.39 | 83.42 | 40.30 | 1400892 | 6.33 | 100741 | 637845 |
| 94  | 90.57 | 83.70 | 40.15 | 1540189 | 6.85 | 101774 | 697218 |
| 95  | 89.15 | 81.72 | 40.19 | 1638846 | 7.04 | 103861 | 731663 |
| 96  | 89.74 | 82.53 | 40.09 | 1248681 | 5.68 | 99614  | 565980 |
| 97  | 91.29 | 84.46 | 40.20 | 1203427 | 5.97 | 99345  | 593250 |
| 98  | 90.22 | 83.19 | 40.17 | 1418995 | 6.29 | 101615 | 639294 |
| 99  | 90.38 | 83.33 | 40.16 | 1095829 | 5.04 | 96874  | 487824 |
| 100 | 90.53 | 83.57 | 40.68 | 1515998 | 6.44 | 110277 | 710325 |
| 101 | 90.47 | 83.49 | 40.21 | 1569362 | 6.69 | 100581 | 672734 |
| 102 | 90.48 | 83.55 | 40.44 | 1612570 | 6.93 | 106477 | 737614 |
| 103 | 90.87 | 84.11 | 40.05 | 1509447 | 6.77 | 99066  | 670450 |
| 104 | 90.90 | 84.02 | 40.32 | 1587542 | 6.45 | 103553 | 667918 |
| 105 | 90.73 | 83.74 | 40.12 | 1182958 | 5.35 | 99487  | 532524 |
| 106 | 90.24 | 83.15 | 40.29 | 1386637 | 5.67 | 97727  | 553970 |
| 107 | 90.33 | 83.10 | 40.16 | 1361840 | 6.07 | 100275 | 608641 |
| 108 | 91.37 | 84.54 | 40.19 | 1886076 | 7.92 | 103145 | 817077 |
| 109 | 91.07 | 84.41 | 40.50 | 1435393 | 5.89 | 102405 | 602940 |
| 110 | 90.61 | 83.87 | 40.39 | 1858483 | 7.61 | 104543 | 795331 |
| 111 | 90.30 | 83.41 | 40.27 | 1571502 | 6.71 | 100818 | 676938 |
| 112 | 89.90 | 82.69 | 41.06 | 1262074 | 5.30 | 104023 | 551589 |
| 113 | 91.44 | 84.63 | 40.06 | 1176685 | 5.62 | 94327  | 530424 |
| 114 | 90.20 | 83.18 | 40.22 | 1474670 | 6.21 | 100587 | 624872 |
| 115 | 90.37 | 83.40 | 40.16 | 1379990 | 6.02 | 98057  | 590267 |
| 116 | 90.40 | 83.36 | 40.50 | 1861126 | 7.56 | 108320 | 818501 |
| 117 | 89.58 | 82.21 | 40.69 | 1667411 | 6.69 | 113301 | 758010 |
| 118 | 90.25 | 83.27 | 40.57 | 1698482 | 6.65 | 106212 | 706178 |
| 119 | 89.89 | 82.55 | 40.78 | 1417296 | 5.87 | 98659  | 578854 |
| 120 | 91.71 | 85.00 | 40.41 | 1021925 | 4.99 | 91165  | 454620 |
| 121 | 91.05 | 84.28 | 40.62 | 1333219 | 5.58 | 109600 | 611442 |
| 122 | 90.77 | 84.03 | 40.51 | 1290453 | 5.74 | 101605 | 583091 |

---
