# Supplementary material for: A high-density genetic map constructed using specific length amplified fragment (SLAF) sequencing and QTL mapping of seed-related traits in sesame (Sesamum indicum L.)
Source: PubMed Central journal article supplement (PMC6935206; doi:10.1186/s12870-019-2172-5), 2019-12-27
Supplement: 12870_2019_2172_MOESM4_ESM.pdf [file 12870_2019_2172_MOESM4_ESM.pdf]

**Table S4 The candidate genes for the seed-related traits**

| Trait                | QTL                                                                                 | Linkage Group ID                                    | Gene ID     | Swissprot annotation                                                                                                                                                           | Nr annotation                                                                                               |
|----------------------|-------------------------------------------------------------------------------------|-----------------------------------------------------|-------------|--------------------------------------------------------------------------------------------------------------------------------------------------------------------------------|-------------------------------------------------------------------------------------------------------------|
| Seed coat color      | <i>qscca*4</i>                                                                      | LG04                                                | SIN_1012044 | E3 ubiquitin protein ligase RIN2 GN=F24A6.70 OS=Arabidopsis thaliana (Mouse-ear cress) PE=1 SV=1                                                                               | PREDICTED: RING finger and transmembrane domain-containing protein 2-like [Solanum lycopersicum]            |
|                      |                                                                                     |                                                     | SIN_1012049 | Putative SWI/SNF-related matrix-associated actin-dependent regulator of chromatin subfamily A member 3-like 2 GN=At5g22750 OS=Arabidopsis thaliana (Mouse-ear cress) PE=2 SV=1 | PREDICTED: E3 ubiquitin-protein ligase SHPRH-like [Vitis vinifera]                                          |
|                      |                                                                                     |                                                     | SIN_1016759 | Aureusidin synthase GN=AS1 OS=Antirrhinum majus (Garden snapdragon) PE=1 SV=1                                                                                                  | polyphenol oxidase [Populus trichocarpa]                                                                    |
|                      |                                                                                     |                                                     | SIN_1012034 | Pentatricopeptide repeat-containing protein At1g02060, chloroplastic (Precursor) GN=At1g02060 OS=Arabidopsis thaliana (Mouse-ear cress) PE=2 SV=2                              | PREDICTED: pentatricopeptide repeat-containing protein At1g02060, chloroplastic-like [Solanum lycopersicum] |
|                      | <i>qsccY9</i>                                                                       | LG09                                                | SIN_1022635 | Ammonium transporter 1 member 3 GN=AMT1-3 OS=Solanum lycopersicum (Tomato) PE=2 SV=1                                                                                           | PREDICTED: ammonium transporter 1 member 3 [Vitis vinifera]                                                 |
|                      |                                                                                     |                                                     | SIN_1022704 | Probable linoleate 9S-lipoxygenase 5 GN=LOX1.5 OS=Solanum tuberosum (Potato) PE=2 SV=1                                                                                         | lipoxygenase [Olea europaea]                                                                                |
|                      |                                                                                     |                                                     | SIN_1022679 | Protein COBRA (Precursor) GN=COB OS=Arabidopsis thaliana (Mouse-ear cress) PE=2 SV=1                                                                                           | PREDICTED: protein COBRA [Vitis vinifera]                                                                   |
|                      |                                                                                     |                                                     | SIN_1022680 | COBRA-like protein 4 (Precursor) GN=COBL4 OS=Arabidopsis thaliana (Mouse-ear cress) PE=2 SV=2                                                                                  | Protein COBRA precursor, putative [Ricinus communis]                                                        |
| Seed size            | <i>qsa11</i>                                                                        | LG11                                                | SIN_1003683 | Mitogen-activated protein kinase YODA GN=YDA OS=Arabidopsis thaliana (Mouse-ear cress) PE=1 SV=1                                                                               | protein kinase [Nicotiana benthamiana]                                                                      |
|                      |                                                                                     |                                                     | SIN_1003684 |                                                                                                                                                                                | PREDICTED: 50S ribosomal protein L25-like [Solanum lycopersicum]                                            |
|                      | <i>qsw5</i>                                                                         | LG05                                                | SIN_1003687 | Serine/threonine-protein kinase SAPK10 GN=OSJNBb0007E22.11 OS=Oryza sativa subsp. japonica (Rice) PE=2 SV=1                                                                    | PREDICTED: serine/threonine-protein kinase SRK2I-like [Solanum lycopersicum]                                |
|                      |                                                                                     |                                                     | SIN_1013822 |                                                                                                                                                                                | Mitochondrial transcription termination factor family protein [Theobroma cacao]                             |
|                      |                                                                                     |                                                     | SIN_1013833 | DEAD-box ATP-dependent RNA helicase 5 GN=B1114D08.16-1 OS=Oryza sativa subsp. japonica (Rice) PE=2 SV=1                                                                        | PREDICTED: DEAD-box ATP-dependent RNA helicase 5 [Vitis vinifera]                                           |
| SIN_1013848          | Auxin response factor 9 GN=ARF9 OS=Arabidopsis thaliana (Mouse-ear cress) PE=1 SV=1 | Auxin response factor 9 isoform 2 [Theobroma cacao] |             |                                                                                                                                                                                |                                                                                                             |
| Thousand seed weight | <i>qtsw9</i>                                                                        | LG09                                                | SIN_1022989 | Trihelix transcription factor GT-3a GN=T1008.90 OS=Arabidopsis                                                                                                                 | Sequence-specific DNA binding transcription                                                                 |

---

|             |                                                                                                                                                                              |                                                                                       |
|-------------|------------------------------------------------------------------------------------------------------------------------------------------------------------------------------|---------------------------------------------------------------------------------------|
| SIN_1023052 | thaliana (Mouse-ear cress) PE=1 SV=1<br>Serine/threonine-protein phosphatase PP2A-3 catalytic subunit<br>GN=F14P22.90 OS=Arabidopsis thaliana (Mouse-ear cress) PE=2<br>SV=1 | factors [Theobroma cacao]<br>serine/threonine-protein phosphatase [Genlisea<br>aurea] |
| SIN_1022987 | WAT1-related protein At1g25270 GN=At1g25270 OS=Arabidopsis<br>thaliana (Mouse-ear cress) PE=2 SV=1                                                                           | Mtn21-like protein [Theobroma cacao]                                                  |

---
